# Supplementary material
Source: MDPI journal article supplement (https://www.mdpi.com/2071-1050/15/4/3637)
Supplement: s1 [file s1]

# Experimental evaluation of conjugate flaws on rock dynamic fracturing

## Supplementary data

To investigate the effects of the geometry setting of conjugate flaws and the loading conditions on the fracturing behavior and failure mechanism of the white sandstone specimens, for each group of specimens, three levels of pre-stress ratio (i.e., 0, 30% and 50%) and three different loading rates are conducted, as shown in Table S1.

**Table S1** Geometrical dimensions and loading conditions of white sandstone specimens.

| Specimen No.    | L/mm   | W/mm  | T/mm  | Flaw               |             | Static stress (percentage of peak stress)/MPa | Pre-stress peak rate/GPa • s <sup>-1</sup> | Loading rate/GPa • s <sup>-1</sup> | Remark                                 |
|-----------------|--------|-------|-------|--------------------|-------------|-----------------------------------------------|--------------------------------------------|------------------------------------|----------------------------------------|
|                 |        |       |       | L <sub>f</sub> /mm | $\alpha$ /° |                                               |                                            |                                    |                                        |
| G0 <sub>0</sub> | 101.04 | 35.49 | 34.69 | -                  | -           | -                                             | -                                          | -                                  | Uniaxial compression                   |
| G1 <sub>0</sub> | 100.43 | 35.16 | 34.85 | 20                 | 20          | -                                             | -                                          | -                                  |                                        |
| G2 <sub>0</sub> | 99.89  | 35.48 | 35.30 | 20                 | -20         | -                                             | -                                          | -                                  |                                        |
| G0-0-0.3        | 101.10 | 34.92 | 35.17 | -                  | -           | 0(0%)                                         |                                            | 1318.59                            | Intact specimen                        |
| G0-0-0.5        | 100.98 | 35.44 | 35.00 | -                  | -           | 0(0%)                                         |                                            | 1530.58                            |                                        |
| G0-0-0.6        | 100.24 | 35.02 | 34.57 | -                  | -           | 0(0%)                                         |                                            | 1628.54                            |                                        |
| G0-30-0.3       | 100.39 | 35.13 | 35.00 | -                  | -           | 32.64(30%)                                    |                                            | 1506.75                            |                                        |
| G0-30-0.5       | 100.84 | 34.90 | 35.09 | -                  | -           | 32.64(30%)                                    |                                            | 1818.62                            |                                        |
| G0-30-0.6       | 101.06 | 34.65 | 34.82 | -                  | -           | 32.64(30%)                                    |                                            | 1893.83                            |                                        |
| G0-50-0.3       | 100.03 | 35.08 | 35.39 | -                  | -           | 54.41(50%)                                    |                                            | 1414.83                            | Intermittent conjugate-flawed specimen |
| G0-50-0.5       | 100.46 | 35.36 | 34.91 | -                  | -           | 54.41(50%)                                    |                                            | 1606.38                            |                                        |
| G0-50-0.6       | 101.49 | 34.90 | 35.36 | -                  | -           | 54.41(50%)                                    |                                            | 1968.77                            |                                        |
| G1-0-0.3        | 100.66 | 34.78 | 35.47 | 20                 | 20          | 0(0%)                                         |                                            | 1483.41                            |                                        |
| G1-0-0.5        | 100.57 | 34.68 | 34.53 | 20                 | 20          | 0(0%)                                         |                                            | 1913.22                            |                                        |
| G1-0-0.6        | 99.69  | 35.49 | 34.63 | 20                 | 20          | 0(0%)                                         |                                            | 2081.16                            |                                        |
| G1-30-0.3       | 99.61  | 34.78 | 35.25 | 20                 | 20          | 17.49(30%)                                    |                                            | 1334.82                            |                                        |
| G1-30-0.5       | 100.40 | 35.44 | 34.96 | 20                 | 20          | 17.49(30%)                                    |                                            | 1557.43                            |                                        |
| G1-30-0.6       | 99.70  | 35.05 | 35.05 | 20                 | 20          | 17.49(30%)                                    |                                            | 1793.46                            |                                        |
| G1-50-0.3       | 100.64 | 34.77 | 34.74 | 20                 | 20          | 29.16(50%)                                    |                                            | 1257.62                            |                                        |
| G1-50-0.5       | 100.58 | 35.30 | 35.00 | 20                 | 20          | 29.16(50%)                                    |                                            | 1471.52                            |                                        |
| G1-50-0.6       | 101.23 | 34.92 | 35.45 | 20                 | 20          | 29.16(50%)                                    |                                            | 1982.35                            |                                        |
| G2-0-0.3        | 101.43 | 35.04 | 35.07 | 20                 | -20         | 0(0%)                                         |                                            | 1284.34                            |                                        |
| G2-0-0.5        | 100.74 | 34.96 | 35.16 | 20                 | -20         | 0(0%)                                         |                                            | 1741.56                            |                                        |
| G2-0-0.6        | 100.58 | 34.78 | 35.10 | 20                 | -20         | 0(0%)                                         |                                            | 1793.40                            |                                        |
| G2-30-0.3       | 101.47 | 34.94 | 35.40 | 20                 | -20         | 21.07(30%)                                    |                                            | 1275.48                            |                                        |
| G2-30-0.5       | 100.32 | 35.12 | 35.12 | 20                 | -20         | 21.07(30%)                                    |                                            | 1447.67                            |                                        |
| G2-30-0.6       | 99.36  | 35.26 | 35.25 | 20                 | -20         | 21.07(30%)                                    |                                            | 1639.84                            |                                        |
| G2-50-0.3       | 101.01 | 34.87 | 34.86 | 20                 | -20         | 35.11(50%)                                    |                                            | 1354.27                            |                                        |
| G2-50-0.5       | 100.2  | 35.01 | 35.12 | 20                 | -20         | 35.11(50%)                                    |                                            | 1607.60                            |                                        |
| G2-50-0.6       | 199.94 | 35.36 | 34.31 | 20                 | -20         | 35.11(50%)                                    |                                            | 1749.27                            |                                        |

Table S2 displays representative failure modes of intact and intermittent conjugate-flawed specimens under three loading conditions: quasi-static, individual dynamic and coupled static-dynamic.

**Table S2.** The failure modes of intact and intermittent conjugate-flawed white sandstone specimens under different loading conditions (The loading direction is horizontal)

| Specimen group                 |                  |                                                | G0                                                                                  | G1                                                                                   | G2                                                                                    |
|--------------------------------|------------------|------------------------------------------------|-------------------------------------------------------------------------------------|--------------------------------------------------------------------------------------|---------------------------------------------------------------------------------------|
| Loading condition              |                  |                                                |                                                                                     |                                                                                      |                                                                                       |
| Quasi-static loading           |                  |                                                |    |    |    |
| Coupled static-dynamic loading | Pre-stress level | Loading rate/ $\text{GPa} \cdot \text{s}^{-1}$ | G0                                                                                  | G1                                                                                   | G2                                                                                    |
|                                | 0%               | 1310-1480                                      |   |   |   |
|                                |                  | 1620-2090                                      |  |  |  |
|                                | 30%              | 1270-1510                                      |  |  |  |
|                                |                  | 1630-1900                                      |  |  |  |
|                                |                  | 1250-1420                                      |  |  |  |
|                                | 50%              | 1250-1420                                      |  |  |  |

|  |  |           |                                                                                                                                                                     |                                                                                                                                                                       |                                                                                                                                                                         |
|--|--|-----------|---------------------------------------------------------------------------------------------------------------------------------------------------------------------|-----------------------------------------------------------------------------------------------------------------------------------------------------------------------|-------------------------------------------------------------------------------------------------------------------------------------------------------------------------|
|  |  | 1740-1990 | 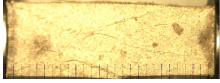  |   |   |
|--|--|-----------|---------------------------------------------------------------------------------------------------------------------------------------------------------------------|-----------------------------------------------------------------------------------------------------------------------------------------------------------------------|-------------------------------------------------------------------------------------------------------------------------------------------------------------------------|
